# Supplementary material
Source: MDPI journal article supplement (https://www.mdpi.com/2227-7102/13/9/966)
Supplement: s1 [file s1]

Archive with 2 entries (2 files):
- File S1 Data extraction.pdf
- File S2 quality appraisal.pdf
